# Supplementary material for: Inulin Improves Diet-Induced Hepatic Steatosis and Increases Intestinal Akkermansia Genus Level
Source: MDPI journal article supplement (doi:10.3390/ijms23020991), 2022-01-17
Supplement: s1 [file s1]

**Figure S1.** **A)** Rarefaction curves of the sequencing depth corresponding to the four mice groups either, at the beginning (I) or the end (F) of the experimental procedures. **B)** The alpha diversity of the four mice groups is presented with the corresponding significance for the initial or final relative abundance for each mice group. C-C, chow-cellulose; C-I, chow-inulin; H-C, fat-enriched cellulose; H-I, fat-enriched inulin. #  $p < 0.05$ , one-way Anova, Tukey's test.

**Figure S2.** **A)** The relative abundance at the Species level is presented for each mice group for the initial (I) or final (F) period of supplementation. **B)** Linear Discriminant Analysis effect size (LEfSE) of the features with statistical significance change between the initial and final periods for the H-I group.

**Figure S3.** **A)** Pearson's correlation of liver damage markers or triglycerides and cholesterol with *A. muciniphila*, in the H-I mice group; the numbers inside squares represents the R-values and the color indicates the correlation direction. **B)** Heatmap showing Pearson's correlation for multiple ASVs and serum metabolites in the H-I mice group at the end of the experimental procedure. See main text for details.

**Figure S4.** Inulin supplementation-derived enriched metabolic pathways. Metagenome inference indicates that propionate (Prop.\_metab.), secondary metabolites (Biosyn./biodeg./sec./metab), fatty acid (Fatty\_acid\_metabolism), biotin (Biotin\_metabolism) and Glutathione (Glutha-tione\_metabolism) are enriched after inulin treatment in the H-I group. Plot indicates the enriched metabolic pathways before (I) or after (F) the eight-week period of inulin supplementation. \*\*  $p < 0.01$  (I vs. F) for each metabolic pathway.
