# Supplementary material for: Inulin Improves Diet-Induced Hepatic Steatosis and Increases Intestinal Akkermansia Genus Level
Source: Int J Mol Sci. 2022 Jan 17;23(2):991. doi: 10.3390/ijms23020991 (PMC8782000; doi:10.3390/ijms23020991)
Supplement: Supplementary file 1 [file ijms-23-00991-s001.zip]

Archive with 5 entries (5 files):
- Supp.Fig.Caption.pdf
- Supp.Figure S1.tif
- Supp.Figure S2.tif
- Supp.Figure S3.tif
- Supp.Figure S4.tif
